# Supplementary material
Source: publisher figshare collection journal article supplement (https://acs.figshare.com/ndownloader/files/3774232)
Supplement: Supplementary file 1 [file 3774232]

# New Energy Efficient Housing Has Reduced Carbon Footprints in Outer but Not in Inner Urban Areas

Juudit Ottelin,<sup>\*,†</sup> Jukka Heinonen,<sup>‡</sup> and Seppo Junnila<sup>†</sup>

<sup>†</sup>Aalto University School of Engineering, P.O. Box 15800, 00076 AALTO Finland

<sup>‡</sup>Iceland University School of Engineering and Natural Sciences, Tæknigarour, Dunhagi 5, 107 Reykjavík, Iceland

## Supporting Information

Total number of pages: 3

Table 5. Scope and boundaries of the carbon footprint model

Page S1

Figure 2. Comparison of carbon footprints of owner-occupiers in new (constructed 2003-2012) and old (constructed before 2003) buildings in inner urban areas

Page S2

Figure 3. Comparison of average housing loan, income and expenditure per capita of residents living in new (constructed 2003-2012) and old (constructed before 2003) buildings in the three studied urban forms

Page S3

Table 5. Scope and boundaries of the carbon footprint model

| COICOP - Classification of individual consumption according to purpose |                                                                    | Additions                                 |
|------------------------------------------------------------------------|--------------------------------------------------------------------|-------------------------------------------|
| 01-12                                                                  | Individual consumption expenditure of households                   |                                           |
| 01                                                                     | Food and non-alcoholic beverages                                   |                                           |
| 01.1                                                                   | Food                                                               |                                           |
| 01.2                                                                   | Non-alcoholic beverages                                            |                                           |
| 02                                                                     | Alcoholic beverages, tobacco and narcotics                         |                                           |
| 02.1                                                                   | Alcoholic beverages                                                |                                           |
| 02.2                                                                   | Tobacco                                                            |                                           |
| 02.3                                                                   | Narcotics                                                          |                                           |
| 03                                                                     | Clothing and footwear                                              |                                           |
| 03.1                                                                   | Clothing                                                           |                                           |
| 03.2                                                                   | Footwear                                                           |                                           |
| 04                                                                     | Housing, water, electricity, gas and other fuels                   | Expenses of housing companies €/m2        |
| 04.1                                                                   | Actual rentals for housing                                         | Emissions from construction, CO2-eq kg/m2 |
| 04.2                                                                   | Imputed rentals for housing                                        |                                           |
| 04.3                                                                   | Maintenance and repair of the dwelling                             |                                           |
| 04.4                                                                   | Water supply and miscellaneous services relating to the dwelling   |                                           |
| 04.5                                                                   | Electricity, gas and other fuels                                   |                                           |
| 05                                                                     | Furnishings, household equipment and routine household maintenance |                                           |
| 05.1                                                                   | Furniture and furnishings, carpets and other floor coverings       |                                           |
| 05.2                                                                   | Household textiles                                                 |                                           |
| 05.3                                                                   | Household appliances                                               |                                           |
| 05.4                                                                   | Glassware, tableware and household utensils                        |                                           |
| 05.5                                                                   | Tools and equipment for house and garden                           |                                           |
| 05.6                                                                   | Goods and services for routine household maintenance               |                                           |
| 06                                                                     | Health                                                             |                                           |
| 06.1                                                                   | Medical products, appliances and equipment                         |                                           |
| 06.2                                                                   | Outpatient services                                                |                                           |
| 06.3                                                                   | Hospital services                                                  |                                           |
| 07                                                                     | Transport                                                          |                                           |
| 07.1                                                                   | Purchase of vehicles                                               |                                           |
| 07.2                                                                   | Operation of personal transport equipment                          | Process LCA data on motor fuels           |
| 07.3                                                                   | Transport services                                                 |                                           |
| 08                                                                     | Communication                                                      |                                           |
| 08.1                                                                   | Postal services                                                    |                                           |
| 08.2                                                                   | Telephone and telefax equipment                                    |                                           |
| 08.3                                                                   | Telephone and telefax services                                     |                                           |
| 09                                                                     | Recreation and culture                                             |                                           |
| 09.1                                                                   | Audio-visual, photographic and information processing equipment    |                                           |
| 09.2                                                                   | Other major durables for recreation and culture                    |                                           |

|      |                                                          |  |
|------|----------------------------------------------------------|--|
| 09.3 | Other recreational items and equipment, gardens and pets |  |
| 09.4 | Recreational and cultural services                       |  |
| 09.5 | Newspapers, books and stationery                         |  |
| 09.6 | Package holidays                                         |  |
| 10   | Education                                                |  |
| 10.1 | Pre-primary and primary education                        |  |
| 10.2 | Secondary education                                      |  |
| 10.3 | Post-secondary non-tertiary education                    |  |
| 10.4 | Tertiary education                                       |  |
| 10.5 | Education not definable by level                         |  |
| 11   | Restaurants and hotels                                   |  |
| 11.1 | Catering services                                        |  |
| 11.2 | Accommodation services                                   |  |
| 12   | Miscellaneous goods and services                         |  |
| 12.1 | Personal care                                            |  |
| 12.2 | Personal effects n.e.c.                                  |  |
| 12.3 | Social protection                                        |  |
| 12.4 | Insurance                                                |  |
| 12.5 | Financial services n.e.c.                                |  |
| 12.6 | Other services n.e.c.                                    |  |

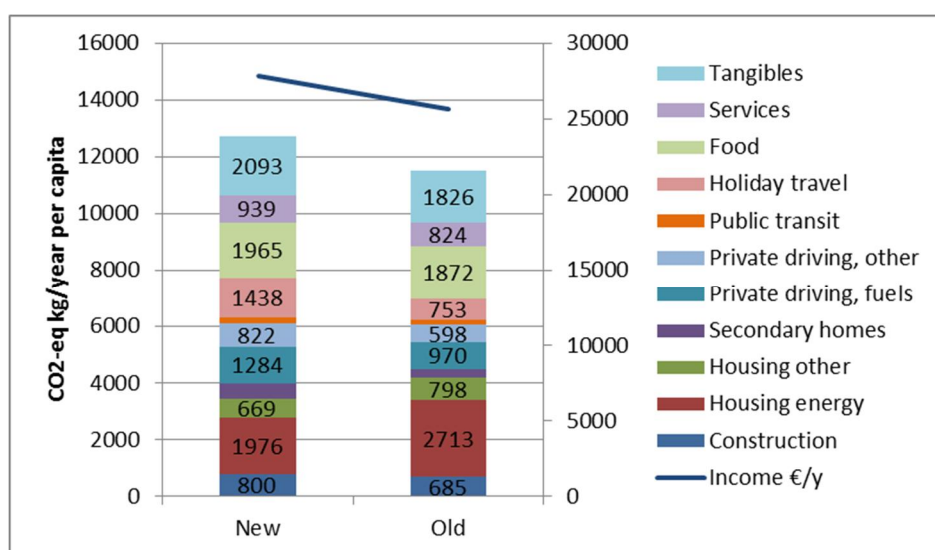

**Figure 2. Comparison of carbon footprints of owner-occupiers in new (constructed 2003-2012) and old (constructed before 2003) buildings in inner urban areas**

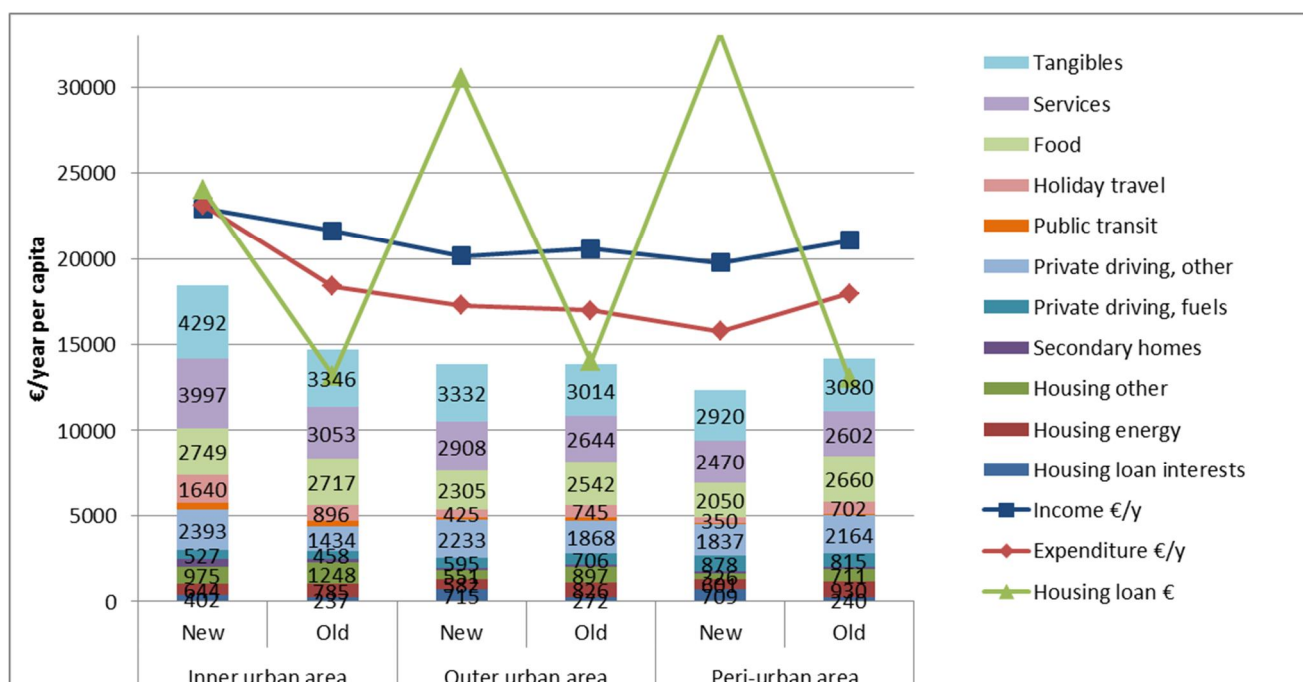

Figure 3. Comparison of average housing loan, income and expenditure per capita of residents living in new (constructed 2003-2012) and old (constructed before 2003) buildings in the three studied urban forms. Expenditure (red line) includes rentals and imputed rentals of owner-occupiers.
